# Supplementary material
Source: ML conference proceedings conference paper supplement (https://proceedings.neurips.cc/paper_files/paper/2019/hash/f90f2aca5c640289d0a29417bcb63a37-Abstract.html)
Supplement: Supplementary file [file f90f2aca5c640289d0a29417bcb63a37-Supplemental.zip]

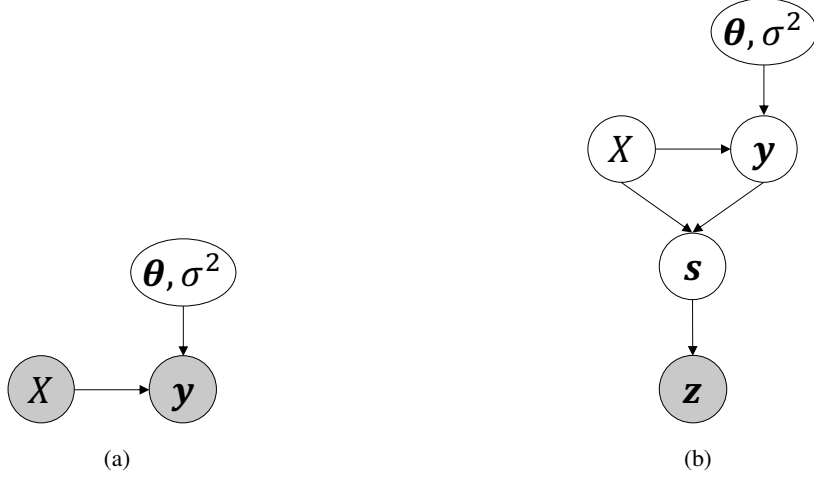

Figure 5: (a) Non-private and (b) private regression models.

## 409 A Appendix

### 410 A.1 Derivation of non-private and private posteriors in Section 3.3

411 See corresponding models in Figure 5

$$\begin{aligned}
 p(\theta, \sigma^2 \mid X, \mathbf{y}) &= \frac{p(\theta, \sigma^2, X, \mathbf{y})}{p(X, \mathbf{y})} \\
 &= \frac{p(X)p(\theta, \sigma^2)p(\mathbf{y} \mid X, \theta, \sigma^2)}{p(X)p(\mathbf{y} \mid X)} \\
 &= \frac{p(\theta, \sigma^2)p(\mathbf{y} \mid X, \theta, \sigma^2)}{p(\mathbf{y} \mid X)} \\
 &= \frac{p(\theta, \sigma^2)p(\mathbf{y} \mid X, \theta, \sigma^2)}{\int p(\mathbf{y}, \theta, \sigma^2 \mid X) d\theta, \sigma^2} \\
 &= \frac{p(\theta, \sigma^2)p(\mathbf{y} \mid X, \theta, \sigma^2)}{\int p(\theta, \sigma^2)p(\mathbf{y} \mid X, \theta, \sigma^2) d\theta, \sigma^2}
 \end{aligned}$$

$$\begin{aligned}
 p(\theta, \sigma^2 \mid z) &= \int p(X, \mathbf{y}, \theta, \sigma^2, z) dX d\mathbf{y} \\
 &= \int \frac{p(X, \mathbf{y}, \theta, \sigma^2)p(z \mid X, \mathbf{y}, \theta, \sigma^2)}{p(z)} dX d\mathbf{y} \\
 &= p(z) \int p(X, \mathbf{y}, \theta, \sigma^2)p(z \mid X, \mathbf{y}, \theta, \sigma^2) dX d\mathbf{y}
 \end{aligned}$$

412 **A.2 Gibbs Sufficient Statistic Update**

413 **A.2.1 Derivations of Equation (2): Components of  $\mu_t$**

$$\begin{aligned}
 \mathbb{E}[x_i y] &= \mathbb{E}_x [x_i \mathbb{E}_{y|x} [y]] \\
 &= \mathbb{E}_x [x_i \boldsymbol{\theta}^T \mathbf{x}] \\
 &= \mathbb{E}_x \left[ x_i \sum_j \theta_j x_j \right] \\
 &= \sum_j \theta_j \mathbb{E}[x_i x_j]
 \end{aligned}$$

$$\begin{aligned}
 \mathbb{E}[y^2] &= \mathbb{E}_{\mathbf{x}} [\mathbb{E}_{y|\mathbf{x}} [y^2]] \\
 &= \mathbb{E}_{\mathbf{x}} \left[ \sigma^2 + (\boldsymbol{\theta}^T \mathbf{x})^2 \right] \\
 &= \sigma^2 + \mathbb{E} \left[ \left( \sum_i \theta_i x_i \right)^2 \right] \\
 &= \sigma^2 + \mathbb{E} \left[ \sum_{i,j} \theta_i \theta_j x_i x_j \right] \\
 &= \sigma^2 + \sum_{i,j} \theta_i \theta_j \mathbb{E}[x_i x_j]
 \end{aligned}$$

414 **A.2.2 Derivations of Equation (3): Components of  $\Sigma_t$**

$$\begin{aligned}
 \text{Cov}(x_i x_j, x_k y) &= \mathbb{E}[x_i x_j x_k y] - \mathbb{E}[x_i x_j] \mathbb{E}[x_k y] \\
 &= \mathbb{E}_x [x_i x_j x_k \mathbb{E}_{y|x} [y]] - \mathbb{E}[x_i x_j] \mathbb{E}[x_k y] \\
 &= \mathbb{E}_x \left[ x_i x_j x_k \sum_l \theta_l x_l \right] - \mathbb{E}[x_i x_j] \sum_l \theta_l \mathbb{E}[x_k x_l] \\
 &= \sum_l \theta_l \mathbb{E}[x_i x_j x_k x_l] - \sum_l \theta_l \mathbb{E}[x_i x_j] \mathbb{E}[x_k x_l] \\
 &= \sum_l \theta_l \text{Cov}(x_i x_j, x_k x_l)
 \end{aligned}$$

$$\begin{aligned}
 \text{Cov}(x_i x_j, y^2) &= \mathbb{E}[x_i x_j y^2] - \mathbb{E}[x_i x_j] \mathbb{E}[y^2] \\
 &= \mathbb{E}_x [x_i x_j \mathbb{E}_{y|x} [y^2]] - \mathbb{E}[x_i x_j] \mathbb{E}[y^2] \\
 &= \mathbb{E}_x \left[ x_i x_j \left( \sigma^2 + \sum_{k,l} \theta_k \theta_l x_k x_l \right) \right] - \mathbb{E}[x_i x_j] \left( \sigma^2 + \sum_{k,l} \theta_k \theta_l \mathbb{E}[x_k x_l] \right) \\
 &= \sigma^2 \mathbb{E}[x_i x_j] + \sum_{k,l} \theta_k \theta_l \mathbb{E}[x_i x_j x_k x_l] - \sigma^2 \mathbb{E}[x_i x_j] - \sum_{k,l} \theta_k \theta_l \mathbb{E}[x_i x_j] \mathbb{E}[x_k x_l] \\
 &= \sum_{k,l} \theta_k \theta_l \text{Cov}(x_i x_j, x_k x_l)
 \end{aligned}$$

$$\begin{aligned}
\text{Cov}(x_i y, x_j y) &= \mathbb{E}[x_i x_j y^2] - \mathbb{E}[x_i y] \mathbb{E}[x_j y] \\
&= \mathbb{E}_x[x_i x_j \mathbb{E}_{y|x}[y^2]] - \left( \sum_k \theta_k \mathbb{E}[x_i x_k] \right) \left( \sum_l \theta_l \mathbb{E}[x_j x_l] \right) \\
&= \mathbb{E} \left[ x_i x_j \left( \sigma^2 + \sum_{k,l} \theta_k \theta_l x_k x_l \right) \right] - \sum_{k,l} \theta_k \theta_l \mathbb{E}[x_i x_k] \mathbb{E}[x_j x_l] \\
&= \sigma^2 \mathbb{E}[x_i x_j] + \sum_{k,l} \theta_k \theta_l (\mathbb{E}[x_i x_j x_k x_l] - \mathbb{E}[x_i x_k] \mathbb{E}[x_j x_l]) \\
&= \sigma^2 \mathbb{E}[x_i x_j] + \sum_{k,l} \theta_k \theta_l \text{Cov}(x_i x_k, x_j x_l)
\end{aligned}$$

$$\begin{aligned}
\text{Cov}(x_i y, y^2) &= \mathbb{E}[x_i y^3] - \mathbb{E}[x_i y] \mathbb{E}[y^2] \\
&= \mathbb{E}_x[x_i \mathbb{E}_{y|x}[y^3]] - \mathbb{E}[x_i y] \mathbb{E}[y^2] \\
&= \mathbb{E}_x \left[ x_i \left( \sum_{j,k,l} \theta_j \theta_k \theta_l x_j x_k x_l + 3\sigma^2 \sum_j \theta_j x_j \right) \right] \\
&\quad - \sum_j \theta_j \mathbb{E}[x_i x_j] \left( \sigma^2 + \sum_{k,l} \theta_k \theta_l x_k x_l \right) \\
&= \sum_{j,k,l} \theta_j \theta_k \theta_l \mathbb{E}[x_i x_j x_k x_l] + 3\sigma^2 \sum_j \theta_j \mathbb{E}[x_i x_j] \\
&\quad - \sigma^2 \sum_j \theta_j \mathbb{E}[x_i x_j] + \sum_{j,k,l} \theta_j \theta_k \theta_l \mathbb{E}[x_i x_j] \mathbb{E}[x_k x_l] \\
&= \sum_{j,k,l} \theta_j \theta_k \theta_l \text{Cov}(x_i x_j, x_k x_l) + 2\sigma^2 \sum_j \theta_j \mathbb{E}[x_i x_j]
\end{aligned}$$

$$\begin{aligned}
\text{Var}(y^2) &= \mathbb{E}[y^4] - \mathbb{E}[y^2]^2 \\
&= 3\sigma^4 + \sum_{j,k,l,m} \theta_j \theta_k \theta_l \theta_m \mathbb{E}[x_j x_k x_l x_m] + 6\sigma^2 \sum_{j,k} \theta_j \theta_k \mathbb{E}[x_j x_k] - \left( \sigma^2 + \sum_{j,k} \theta_j \theta_k \mathbb{E}[x_j x_k] \right)^2 \\
&= 3\sigma^4 + \sum_{j,k,l,m} \theta_j \theta_k \theta_l \theta_m \mathbb{E}[x_j x_k x_l x_m] + 6\sigma^2 \sum_{j,k} \theta_j \theta_k \mathbb{E}[x_j x_k] \\
&\quad - \sigma^4 - 2\sigma^2 \sum_{j,k} \theta_j \theta_k \mathbb{E}[x_j x_k] - \sum_{j,k,l,m} \theta_j \theta_k \theta_l \theta_m \mathbb{E}[x_j x_k] \mathbb{E}[x_l x_m] \\
&= 2\sigma^4 + \sum_{j,k,l,m} \theta_j \theta_k \theta_l \theta_m (\mathbb{E}[x_j x_k x_l x_m] - \mathbb{E}[x_j x_k] \mathbb{E}[x_l x_m]) + 4\sigma^2 \sum_{j,k} \theta_j \theta_k \mathbb{E}[x_j x_k] \\
&= 2\sigma^4 + \sum_{j,k,l,m} \theta_j \theta_k \theta_l \theta_m \text{Cov}(x_j x_k, x_l x_m) + 4\sigma^2 \sum_{j,k} \theta_j \theta_k \mathbb{E}[x_j x_k]
\end{aligned}$$
